# Supplementary material for: Temporal trends in frequency, type and severity of myopia and associations with key environmental risk factors in the UK: Findings from the UK Biobank Study
Source: PubMed Central journal article supplement (PMC8769366; doi:10.1371/journal.pone.0260993), 2022-01-19

**S1 fig: Flowchart of participation**

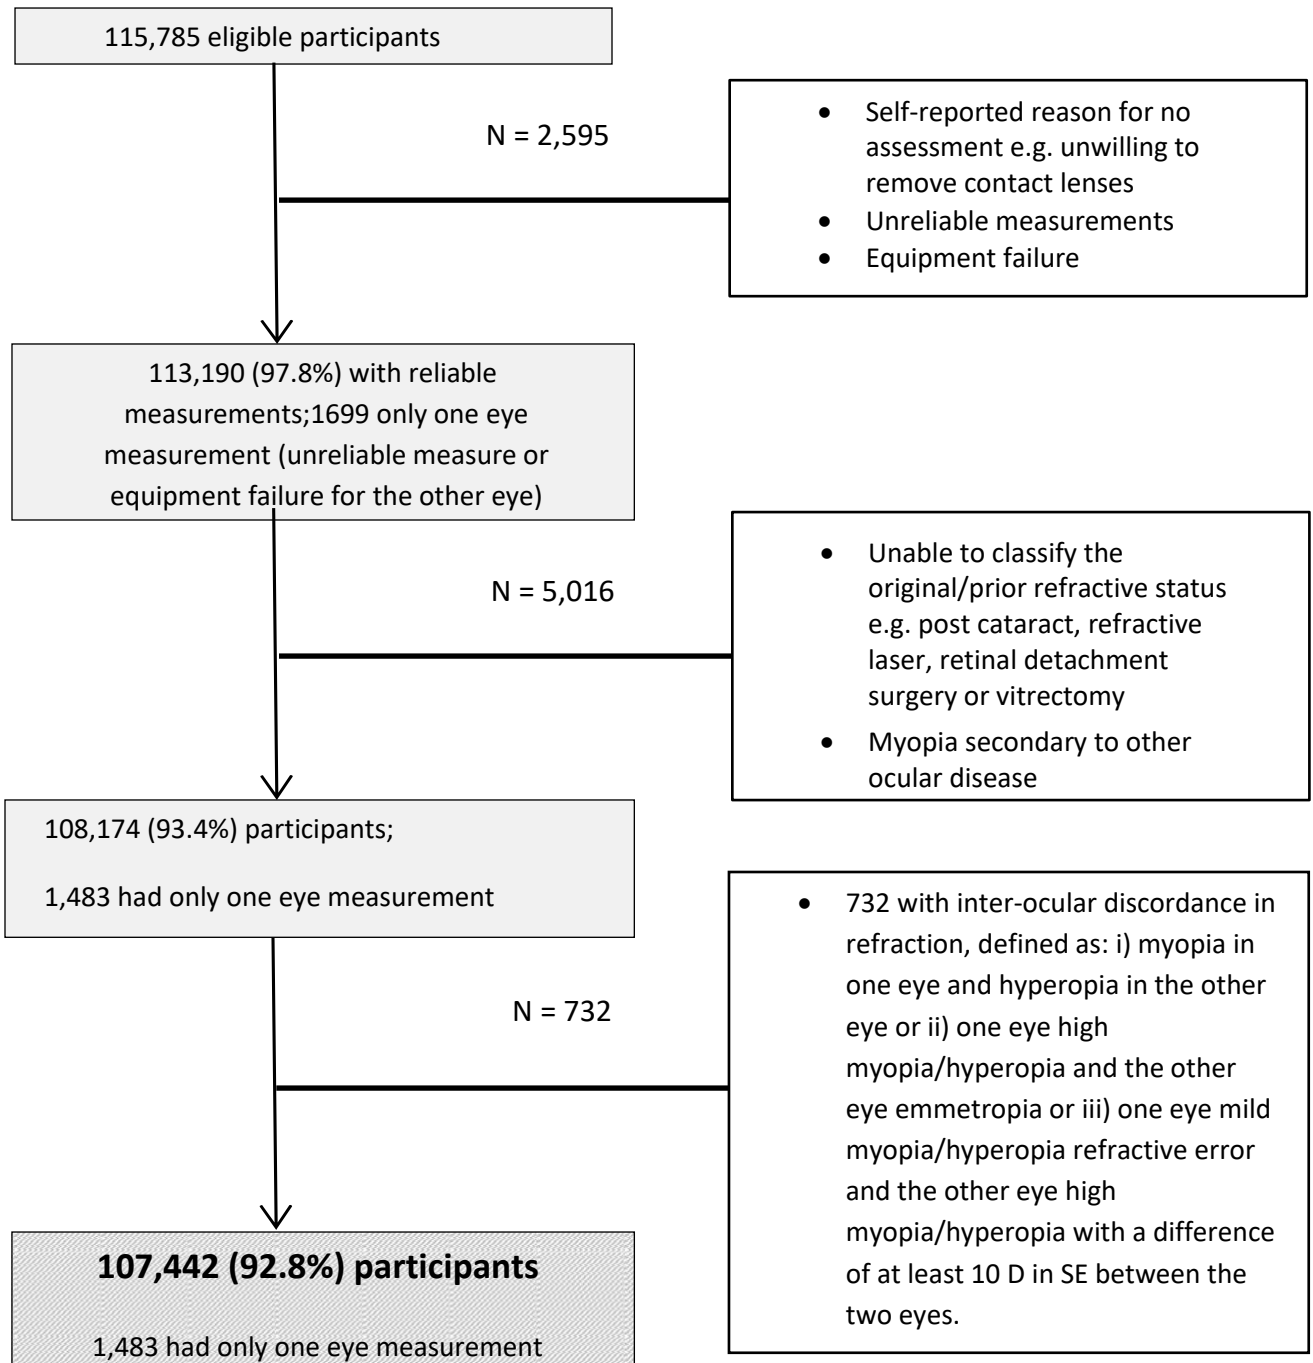

Supplement: pone.0260993.s001.pdf [file pone.0260993.s001.pdf]
