# Supplementary material for: Temporal trends in frequency, type and severity of myopia and associations with key environmental risk factors in the UK: Findings from the UK Biobank Study
Source: PubMed Central journal article supplement (PMC8769366; doi:10.1371/journal.pone.0260993), 2022-01-19

### Childhood-onset myopia

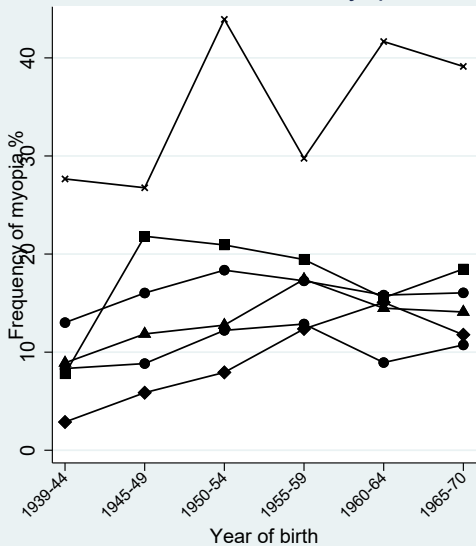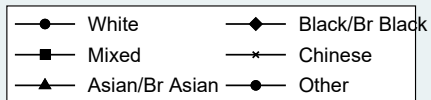

### Adult-onset myopia

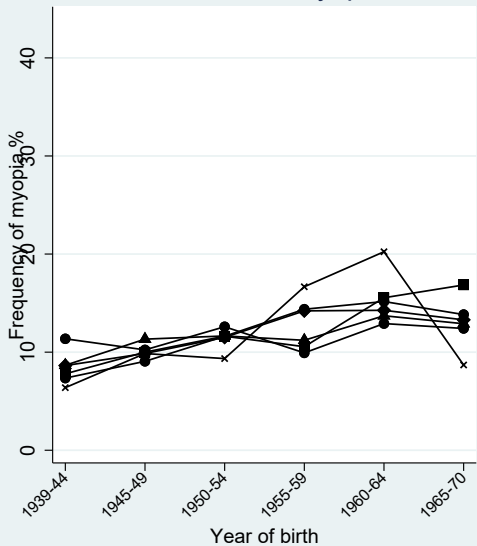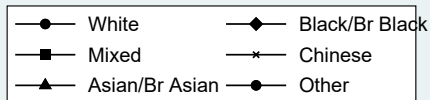

Supplement: pone.0260993.s004.pdf [file pone.0260993.s004.pdf]
