# Supplementary material for: Temporal trends in frequency, type and severity of myopia and associations with key environmental risk factors in the UK: Findings from the UK Biobank Study
Source: PubMed Central journal article supplement (PMC8769366; doi:10.1371/journal.pone.0260993), 2022-01-19
Supplement: pone.0260993.s005.pdf [file pone.0260993.s005.pdf]

**S1\_Table:** Median MSE (mean spherical equivalent) and interquartile range (IQR): childhood-onset myopia (subdivided as before age 10 and between aged 10 and 16 years) and all childhood-onset myopia, by year of birth as 5 year bands.

| Year of birth | Childhood-onset <10yrs |            |                | Childhood-onset 10 to <16yrs |            |                | All childhood-onset myopia |            |                |
|---------------|------------------------|------------|----------------|------------------------------|------------|----------------|----------------------------|------------|----------------|
|               | n                      | Median MSE | IQR            | n                            | Median MSE | IQR            | n                          | Median MSE | IQR            |
| 1939-44       | 594                    | -4.66      | [-2.97, -6.65] | 1,681                        | -3.57      | [-2.25, -4.96] | 2,275                      | -3.80      | [-2.39, -5.44] |
| 1945-49       | 1,117                  | -4.94      | [-3.15, -7.17] | 2,745                        | -3.57      | [-2.31, -5.18] | 3,862                      | -3.88      | [-2.52, -5.70] |
| 1950-54       | 935                    | -5.36      | [-3.57, -7.58] | 2,143                        | -3.84      | [-2.45, -5.44] | 3,078                      | -4.18      | [-2.72, -6.04] |
| 1955-59       | 777                    | -5.64      | [-3.63, -7.50] | 1,658                        | -4.03      | [-2.69, -5.58] | 2,435                      | -4.39      | [-2.97, -6.34] |
| 1960-64       | 580                    | -5.92      | [-3.79, -8.14] | 1,336                        | -3.98      | [-2.66, -5.55] | 1,916                      | -4.46      | [-2.98, -6.37] |
| 1965-70       | 444                    | -5.43      | [-3.79, -7.78] | 1,126                        | -4.07      | [-2.77, -5.65] | 1,570                      | -4.43      | [-2.98, -6.18] |
| Total         | 4,447                  | -5.27      | [-3.43, -7.45] | 10,687                       | -3.80      | [-2.46, -5.36] | 15,134                     | -4.14      | [-2.67, -5.99] |

- Numbers do not include n=120 individuals who did not report age of first wearing glasses and were assigned category based on other aggregate evidence.
