# Supplementary material for: Temporal trends in frequency, type and severity of myopia and associations with key environmental risk factors in the UK: Findings from the UK Biobank Study
Source: PubMed Central journal article supplement (PMC8769366; doi:10.1371/journal.pone.0260993), 2022-01-19
Supplement: pone.0260993.s006.pdf [file pone.0260993.s006.pdf]

**S2.1\_Table:** Association of myopia (all, childhood-onset and adult-onset), with socio-demographic and environmental factors in **females**.

| Factors                             | Childhood-onset myopia |                            |                            | Adult-onset myopia |                           |                            | All myopia |                           |                            | Emmetropia |
|-------------------------------------|------------------------|----------------------------|----------------------------|--------------------|---------------------------|----------------------------|------------|---------------------------|----------------------------|------------|
|                                     | N<br>9460              | Unadjusted<br>OR* (95% CI) | Adjusted OR **<br>(95% CI) | N<br>5864          | Unadjusted<br>OR* (95%CI) | Adjusted OR **<br>(95% CI) | N<br>15324 | Unadjusted<br>OR* (95%CI) | Adjusted OR **<br>(95% CI) | N<br>24977 |
| Year of birth                       | N                      |                            |                            | n                  |                           |                            | n          |                           |                            | N          |
| 1939-1944                           | 1254                   | <b>1</b>                   | 1                          | 586                | <b>1</b>                  | <b>1</b>                   | 1840       | <b>1</b>                  | 1                          | 3083       |
| 1945-1949                           | 2321                   | 1.10                       | <b>1.03 (1.02, 1.05)</b>   | 1092               | <b>1.11</b>               | 1.08 (0.99, 1.08)          | 3413       | <b>1.10</b>               | <b>1.05 (1.02, 1.08)</b>   | 5179       |
| 1950-1954                           | 1926                   | 1.05                       | 0.94 (0.84, 1.06)          | 1077               | <b>1.26</b>               | <b>1.21 (1.08, 1.35)</b>   | 3003       | <b>1.12</b>               | 1.03 (0.94, 1.12)          | 4491       |
| 1955-1959                           | 1656                   | 0.93                       | <b>0.86 (0.75, 0.97)</b>   | 1188               | <b>1.43</b>               | <b>1.37 (1.31, 1.43)</b>   | 2844       | <b>1.09</b>               | 1.02 (0.94, 1.09)          | 4364       |
| 1960-1964                           | 1300                   | <b>0.75</b>                | <b>0.70 (0.64, 0.77)</b>   | 1109               | <b>1.37</b>               | 1.31 (1.24, 1.40)          | 2409       | <b>0.95</b>               | <b>0.89 (0.83, 0.95)</b>   | 4249       |
| 1965-1970                           | 1003                   | <b>0.68</b>                | <b>0.64 (0.55, 0.74)</b>   | 812                | <b>1.18</b>               | <b>1.14 (1.08, 1.21)</b>   | 1815       | <b>0.84</b>               | <b>0.79 (0.73, 0.86)</b>   | 3611       |
| Highest educational qualification ¥ |                        |                            |                            |                    |                           |                            |            |                           |                            |            |
| None                                | 599                    | 1                          | 1                          | 538                | 1                         | 1                          | 1137       | 1                         | 1                          | 3347       |
| O-level                             | 2214                   | <b>1.63</b>                | <b>1.81 (1.54, 2.13)</b>   | 1826               | <b>1.50</b>               | <b>1.36 (1.20, 1.54)</b>   | 4040       | <b>1.57</b>               | <b>1.62 (1.41, 1.86)</b>   | 7598       |
| A-level                             | 1570                   | <b>1.99</b>                | <b>2.23 (1.86, 2.68)</b>   | 1043               | <b>1.47</b>               | <b>1.34 (1.18, 1.51)</b>   | 2613       | <b>1.75</b>               | <b>1.81 (1.64, 2.00)</b>   | 4403       |
| Higher-level                        | 5077                   | <b>2.95</b>                | <b>3.29 (2.78, 3.88)</b>   | 2457               | <b>1.59</b>               | <b>1.43 (1.32, 1.56)</b>   | 7534       | <b>2.30</b>               | <b>2.38 (2.15, 2.62)</b>   | 9629       |
| Accommodation tenure                |                        |                            |                            |                    |                           |                            |            |                           |                            |            |
| Council rental                      | 427                    | 1                          | 1                          | 305                | 1                         | 1                          | 732        | 1                         | 1                          | 1873       |
| Private rental                      | 276                    | 1.17                       | 1.00 (0.81, 1.22)          | 201                | <b>1.20</b>               | 1.14 (0.91, 1.41)          | 477        | 1.18                      | 1.05 (0.85, 1.29)          | 1032       |
| Own with mortgage                   | 3447                   | <b>1.51</b>                | 1.20 (0.99, 1.45)          | 258                | <b>1.57</b>               | <b>1.42 (1.15, 1.76)</b>   | 6005       | <b>1.53</b>               | <b>1.28 (1.06, 1.55)</b>   | 10025      |
| Own                                 | 5310                   | <b>1.93</b>                | <b>1.35 (1.15, 1.60)</b>   | 2800               | <b>1.43</b>               | <b>1.43 (1.15, 1.79)</b>   | 810        | <b>1.72</b>               | <b>1.38 (1.15, 1.65)</b>   | 12047      |
| Ethnicity                           |                        |                            |                            |                    |                           |                            |            |                           |                            |            |
| White                               | 8616                   | 1                          | 1                          | 5210               | 1                         | 1                          | 13840      | 1                         | 1                          | 22078      |
| Mixed ethnicity                     | 112                    | 1.00                       | 1.10 (0.84, 1.43)          | 70                 | 1.03                      | 1.02 (0.79, 1.31)          | 182        | 1.01                      | 1.07 (0.84, 1.35)          | 288        |
| Asian or Asian British§             | 251                    | <b>0.71</b>                | <b>0.79 (0.68, 0.91)</b>   | 179                | <b>0.84</b>               | <b>0.84 (0.75, 0.93)</b>   | 431        | <b>0.76</b>               | <b>0.80 (0.73, 0.88)</b>   | 909        |
| Black or Black British              | 279                    | <b>0.65</b>                | <b>0.77 (0.67, 0.89)</b>   | 252                | 0.97                      | 1.00 (0.95, 1.05)          | 532        | <b>0.77</b>               | <b>0.86 (0.80, 0.93)</b>   | 1097       |
| Chinese                             | 97                     | <b>2.00</b>                | <b>2.05 (1.51, 2.79)</b>   | 42                 | <b>1.43</b>               | <b>1.41 (1.21, 1.63)</b>   | 139        | <b>1.79</b>               | <b>1.78 (1.39, 2.27)</b>   | 124        |
| Other                               | 104                    | <b>0.55</b>                | <b>0.59 (0.46, 0.77)</b>   | 94                 | 0.84                      | 0.84 (0.74, 1.07)          | 200        | <b>0.66</b>               | <b>0.70 (0.58, 0.86)</b>   | 481        |

\*OR = Odds Ratio. 95% CI = 95% confidence interval. \*\* Adjusted by year of birth, sex, educational qualification, accommodation tenure, ethnicity, variance adjustment for test centre. ¥O level: State examination at age 16 years; A level: State examination at age 18 years. § Asian category includes Indian, Pakistani and Bangladeshi. **Bold** fonts indicate significant associations at the 5% level.
