# Supplementary material for: Temporal trends in frequency, type and severity of myopia and associations with key environmental risk factors in the UK: Findings from the UK Biobank Study
Source: PubMed Central journal article supplement (PMC8769366; doi:10.1371/journal.pone.0260993), 2022-01-19
Supplement: pone.0260993.s007.pdf [file pone.0260993.s007.pdf]

**S2.2\_Table:** Association of myopia (all, childhood-onset and adult-onset), with socio-demographic and environmental factors in **males**.

| Factors                             | Childhood-onset myopia |                         |                          | Adult-onset myopia |                        |                          | All myopia |                        |                          | Emmetropia |
|-------------------------------------|------------------------|-------------------------|--------------------------|--------------------|------------------------|--------------------------|------------|------------------------|--------------------------|------------|
|                                     | N                      | Unadjusted OR* (95% CI) | Adjusted OR ** (95% CI)  | N                  | Unadjusted OR* (95%CI) | Adjusted OR ** (95% CI)  | N          | Unadjusted OR* (95%CI) | Adjusted OR ** (95% CI)  | N          |
| Year of birth                       | N                      |                         |                          | N                  |                        |                          | N          |                        |                          | N          |
| 1939-1944                           | 1214                   | <b>1</b>                | 1                        | 850                | <b>1</b>               | <b>1</b>                 | 2064       | <b>1</b>               | 1                        | 3556       |
| 1945-1949                           | 1811                   | 1.09                    | 1.02 (0.92, 1.12)        | 1300               | <b>1.12</b>            | 1.07 (0.98, 1.18)        | 3111       | 1.10                   | 1.04 (0.95, 1.14)        | 4855       |
| 1950-1954                           | 1387                   | 1.11                    | 1.03 (0.80, 1.19)        | 1066               | 1.21                   | 1.15 (1.07, 1.24)        | 2453       | <b>1.15</b>            | 1.08 (0.99, 1.18)        | 3673       |
| 1955-1959                           | 1016                   | <b>0.86</b>             | <b>0.86 (0.75, 0.99)</b> | 1025               | <b>1.24</b>            | <b>1.20 (1.15, 1.24)</b> | 2041       | 1.02                   | 1.00 (0.92, 1.08)        | 3459       |
| 1960-1964                           | 814                    | <b>0.68</b>             | <b>0.72 (0.60, 0.86)</b> | 913                | 1.09                   | 1.07 (0.95, 1.19)        | 1727       | <b>0.85</b>            | <b>0.86 (0.78, 0.95)</b> | 3504       |
| 1965-1970                           | 687                    | <b>0.63</b>             | <b>0.66 (0.55, 0.78)</b> | 667                | <b>0.87</b>            | <b>0.86 (0.82, 0.88)</b> | 1354       | <b>0.73</b>            | <b>0.73 (0.67, 0.80)</b> | 3199       |
| Highest educational qualification ¥ |                        |                         |                          |                    |                        |                          |            |                        |                          |            |
| None                                | 385                    | 1                       | 1                        | 487                | 1                      | 1                        | 872        | 1                      | 1                        | 3391       |
| O-level                             | 1212                   | <b>1.78</b>             | <b>2.00 (1.87, 2.16)</b> | 1443               | <b>1.68</b>            | <b>1.67 (1.46, 1.88)</b> | 2655       | <b>1.73</b>            | <b>1.83 (1.67, 2.00)</b> | 5992       |
| A-level                             | 1223                   | <b>2.46</b>             | <b>2.63 (2.35, 2.95)</b> | 1158               | <b>1.84</b>            | <b>1.81 (1.54, 2.10)</b> | 2381       | <b>2.11</b>            | <b>2.17 (1.93, 2.44)</b> | 4380       |
| Higher-level                        | 4109                   | <b>4.27</b>             | <b>4.62 (4.06, 5.27)</b> | 2733               | <b>2.24</b>            | <b>2.22 (1.95, 2.48)</b> | 6842       | <b>3.13</b>            | <b>3.25 (2.94, 3.59)</b> | 8483       |
| Accommodation tenure                |                        |                         |                          |                    |                        |                          |            |                        |                          |            |
| Council rental                      | 332                    | 1                       | 1                        | 310                | 1                      | 1                        | 642        | 1                      | 1                        | 1711       |
| Private rental                      | 288                    | 1.22                    | 0.96 (0.74, 1.24)        | 241                | 1.09                   | 0.97 (0.84, 1.12)        | 529        | 1.16                   | 0.96 (0.78, 1.17)        | 1220       |
| Own with mortgage                   | 2441                   | <b>1.37</b>             | 0.96 (0.76, 1.22)        | 2444               | <b>1.47</b>            | <b>1.24 (1.07, 1.43)</b> | 4885       | <b>1.42</b>            | 1.09 (0.91, 1.29)        | 9182       |
| Own                                 | 3868                   | <b>1.97</b>             | 1.18 (0.88, 1.60)        | 2826               | <b>1.54</b>            | <b>1.31 (1.12, 1.51)</b> | 6694       | <b>1.76</b>            | 1.24 (0.99, 1.55)        | 10133      |
| Ethnicity                           |                        |                         |                          |                    |                        |                          |            |                        |                          |            |
| White                               | 6407                   | 1                       | 1                        | 5201               | 1                      | 1                        | 11639      | 1                      | 1                        | 1963       |
| Mixed ethnicity                     | 51                     | 0.81                    | 0.95 (0.73, 1.23)        | 49                 | 0.96                   | 1.03 (0.83, 1.29)        | 100        | 0.88                   | 0.99(0.88, 1.11)         | 192        |
| Asian or Asian British§             | 248                    | <b>0.71</b>             | <b>0.76 (0.64, 0.90)</b> | 251                | 0.88                   | 0.92 (0.80, 1.06)        | 501        | <b>0.79</b>            | <b>0.83 (0.73, 0.95)</b> | 1074       |
| Black or Black British              | 101                    | <b>0.34</b>             | <b>0.41 (0.28, 0.60)</b> | 192                | <b>0.80</b>            | 0.89 (0.78, 1.00)        | 295        | <b>0.55</b>            | <b>0.64 (0.52, 0.78)</b> | 911        |
| Chinese                             | 69                     | <b>3.11</b>             | <b>2.85 (1.96, 4.15)</b> | 15                 | 0.83                   | 0.85 (0.64, 1.11)        | 84         | <b>2.09</b>            | <b>1.95 (1.38, 2.74)</b> | 68         |
| Other                               | 53                     | <b>0.47</b>             | <b>0.50 (0.42, 0.61)</b> | 78                 | <b>0.84</b>            | 0.92 (0.85, 1.00)        | 131        | <b>0.64</b>            | <b>0.69 (0.64, 0.73)</b> | 348        |

\*OR = Odds Ratio. 95% CI = 95% confidence interval. \*\* Adjusted by year of birth, sex, educational qualification, accommodation tenure, ethnicity, variance adjustment for test centre. ¥O level: State examination at age 16 years; A level: State examination at age 18 years. § Asian category includes Indian, Pakistani and Bangladeshi. **Bold** fonts indicate significant associations at the 5% level.
