# Supplementary material for: Temporal trends in frequency, type and severity of myopia and associations with key environmental risk factors in the UK: Findings from the UK Biobank Study
Source: PubMed Central journal article supplement (PMC8769366; doi:10.1371/journal.pone.0260993), 2022-01-19
Supplement: pone.0260993.s008.pdf [file pone.0260993.s008.pdf]

S3\_Table: Frequency of myopia (all, childhood-onset and adult-onset), emmetropia and hypermetropia in the UK Biobank population: distribution of socio-demographic and environmental factors.

| Factor                             | Childhood-onset myopia |                      | Adult-onset myopia |                      | All myopia |                      | Emmetropia |                      | Hypermetropia |                      |
|------------------------------------|------------------------|----------------------|--------------------|----------------------|------------|----------------------|------------|----------------------|---------------|----------------------|
|                                    | n                      | % (95% CI)           | n                  | % (95% CI)           | n          | % (95% CI)           | n          | % (95% CI)           | n             | % (95% CI)           |
| N = 107,442                        |                        |                      |                    |                      |            |                      |            |                      |               |                      |
| Population %                       | 16,786                 | 15.6<br>(15.4, 15.8) | 12,066             | 11.2<br>(11.0, 11.4) | 28,852     | 26.9<br>(26.6, 27.1) | 48,960     | 45.6<br>(45.3, 45.9) | 29,630        | 27.6<br>(27.3, 27.8) |
| Year of birth                      |                        |                      |                    |                      |            |                      |            |                      |               |                      |
| 1939-44                            | 2,529                  | 12.6<br>(12.2, 13.1) | 1,482              | 7.4<br>(7.0, 7.8)    | 4,011      | 20.0<br>(19.5, 20.6) | 6,884      | 34.4<br>(33.7, 35.0) | 9,147         | 45.6<br>(45.0, 46.3) |
| 1945-49                            | 4,219                  | 15.6<br>(15.2, 16.1) | 2,473              | 9.2<br>(8.8, 9.5)    | 6,692      | 24.8<br>(24.3, 25.3) | 10,353     | 38.4<br>(37.8, 39.0) | 9,918         | 36.8<br>(36.2, 37.4) |
| 1950-54                            | 3,378                  | 17.8<br>(17.2, 18.3) | 2,207              | 11.6<br>(11.2, 12.1) | 5,585      | 29.4<br>(28.8, 30.0) | 8,418      | 44.3<br>(43.6, 45.0) | 4,995         | 26.3<br>(25.7, 26.9) |
| 1955-59                            | 2,722                  | 16.9<br>(16.3, 17.5) | 2,263              | 14.0<br>(13.5, 14.6) | 4,985      | 30.9<br>(30.2, 31.6) | 8,081      | 50.1<br>(49.3, 50.8) | 3,073         | 19.0<br>(18.4, 19.7) |
| 1960-64                            | 2,182                  | 15.6<br>(15.0, 16.2) | 2,104              | 15.0<br>(14.4, 15.6) | 4,286      | 30.6<br>(29.8, 31.4) | 8,071      | 57.6<br>(56.8, 58.4) | 1,653         | 11.8<br>(11.3, 12.3) |
| 1965-70                            | 1,756                  | 15.6<br>(14.9, 16.2) | 1,537              | 13.6<br>(13.0, 14.3) | 3,293      | 29.2<br>(28.3, 30.0) | 7,153      | 63.4<br>(62.5, 64.2) | 844           | 7.5 (7.0, 8.0)       |
| Sex                                |                        |                      |                    |                      |            |                      |            |                      |               |                      |
| Female                             | 9,689                  | 16.6<br>(16.3, 16.9) | 6,048              | 10.3<br>(10.1, 10.6) | 15,737     | 26.9<br>(26.6, 27.3) | 25,823     | 44.2<br>(43.8, 44.6) | 16,885        | 28.9<br>(28.5, 29.3) |
| Male                               | 7,097                  | 14.5<br>(14.2, 14.8) | 6,018              | 12.3<br>(12.0, 12.6) | 13,115     | 26.8<br>(26.4, 27.2) | 23,137     | 47.2<br>(46.8, 47.7) | 12,745        | 26.0<br>(25.6, 26.4) |
| Highest educational qualification¥ |                        |                      |                    |                      |            |                      |            |                      |               |                      |
| None                               | 1,009                  | 6.4<br>(6.0, 6.8)    | 1,054              | 6.7<br>(6.3, 7.1)    | 2,063      | 13.1<br>(12.6, 13.6) | 6,951      | 44.1<br>(43.3, 44.8) | 6,762         | 42.9<br>(42.1, 43.6) |
| O-level                            | 3,500                  | 12.4<br>(12.0, 12.8) | 3,344              | 11.8<br>(11.5, 12.2) | 6,844      | 24.2<br>(23.7, 24.7) | 13,849     | 49.0<br>(48.4, 49.6) | 7,579         | 26.8<br>(26.3, 27.3) |
| A-level                            | 2,854                  | 14.9<br>(14.4, 15.4) | 2,248              | 11.7<br>(11.3, 12.2) | 5,102      | 26.6<br>(26.0, 27.3) | 8,974      | 46.8<br>(46.1, 47.5) | 5,085         | 26.5<br>(25.9, 27.2) |
| Higher-level                       | 9,329                  | 21.8<br>(21.4, 22.2) | 5,292              | 12.4<br>(12.1, 12.7) | 14,621     | 34.2<br>(33.7, 34.6) | 18,446     | 43.1<br>(42.7, 43.6) | 9,700         | 22.7<br>(22.3, 23.1) |
| Missing                            | 94                     | -                    | 128                | -                    | 222        | -                    | 740        | -                    | 504           | -                    |
| Accommodation tenure               |                        |                      |                    |                      |            |                      |            |                      |               |                      |

|                         |        |                     |        |                     |        |                     |        |                     |        |                     |
|-------------------------|--------|---------------------|--------|---------------------|--------|---------------------|--------|---------------------|--------|---------------------|
| Rent from council       | 782    | 10.7<br>(10.0,11.4) | 642    | 8.8 (8.2,9.5)       | 1,424  | 19.5<br>(18.6,20.4) | 3,720  | 51.0<br>(49.8,52.1) | 2,155  | 29.5<br>(28.5,30.6) |
| Rent from private       | 571    | 13.1<br>(12.1,14.2) | 455    | 10.5<br>(9.6,11.4)  | 1,026  | 23.6<br>(22.3,24.9) | 2,328  | 53.5<br>(52.0,55.0) | 997    | 22.9<br>(21.7,24.2) |
| Own with mortgage       | 5,937  | 15.7<br>(15.3,16.1) | 5,044  | 13.3<br>(13.0,13.7) | 10,981 | 29.0<br>(28.6,29.5) | 19,441 | 51.4<br>(50.9,51.9) | 7,431  | 19.6<br>(19.2,20.0) |
| Own outright            | 9,251  | 16.6<br>(16.3,16.9) | 5,684  | 10.2<br>(9.9,10.4)  | 14,935 | 26.4<br>(26.4,27.1) | 22,458 | 40.2<br>(39.8,40.6) | 18,444 | 33.0<br>(32.6,33.4) |
| <i>Missing</i>          | 245    | -                   | 241    | -                   | 486    | -                   | 1,013  | -                   | 603    | -                   |
| Ethnicity               |        |                     |        |                     |        |                     |        |                     |        |                     |
| White                   | 15,257 | 15.9<br>(15.7,16.2) | 10,659 | 11.1<br>(10.9,11.3) | 25,916 | 27.6<br>(26.8,27.3) | 42,625 | 44.5<br>(44.2,44.8) | 27,242 | 28.4<br>(28.2,28.7) |
| Mixed ethnicity         | 168    | 17.2<br>(15.0,19.8) | 122    | 12.5<br>(10.6,14.8) | 290    | 29.8<br>(27.0,32.7) | 516    | 53.0<br>(49.8,56.1) | 168    | 17.2<br>(15.0,19.8) |
| Asian or Asian British§ | 528    | 13.1<br>(12.1,14.2) | 472    | 11.7<br>(10.7,12.7) | 1,000  | 24.8<br>(23.5,26.2) | 2,185  | 54.2<br>(52.6,55.7) | 847    | 21.0<br>(18.5,21.0) |
| Black or Black British  | 396    | 10.5<br>(9.6,11.6)  | 479    | 12.8<br>(11.7,13.9) | 875    | 23.3<br>(22.0,24.7) | 2,143  | 57.0<br>(55.4,58.6) | 740    | 19.7<br>(18.5,21.0) |
| Chinese                 | 169    | 34.5<br>(30.3,38.8) | 63     | 12.7<br>(10.1,16.1) | 232    | 47.4<br>(42.9,51.8) | 205    | 41.8<br>(37.5,46.3) | 53     | 10.8<br>(8.3,13.9)  |
| Other                   | 166    | 10.2<br>(8.8,11.8)  | 189    | 11.6<br>(10.2,13.3) | 355    | 21.8<br>(19.9,23.9) | 908    | 55.8<br>(53.4,58.2) | 364    | 22.4<br>(20.4,24.5) |
| <i>Missing</i>          | 102    | -                   | 82     | -                   | 184    | -                   | 378    | -                   | 216    | -                   |

¥O level: State examination at age 16 years; A level: State examination at age 18 years. § Asian category includes Indian, Pakistani and Bangladeshi.
