# Supplementary material for: Temporal trends in frequency, type and severity of myopia and associations with key environmental risk factors in the UK: Findings from the UK Biobank Study
Source: PubMed Central journal article supplement (PMC8769366; doi:10.1371/journal.pone.0260993), 2022-01-19
Supplement: pone.0260993.s009.pdf [file pone.0260993.s009.pdf]

**S4\_Tables: Frequency of myopia (all, childhood-onset and adult-onset), emmetropia and hypermetropia: distribution of socio-demographic and environmental factors, by year of birth (1939-44, 1945-49, 1950-54, 1955-59, 1960-64 and 1965-69).**

| Factor                                    | Childhood-onset myopia |                      | Adult-onset myopia |                    | All myopia |                      | Emmetropia |                      | Hypermetropia |                      |
|-------------------------------------------|------------------------|----------------------|--------------------|--------------------|------------|----------------------|------------|----------------------|---------------|----------------------|
|                                           | n                      | % (95% CI)           | n                  | % (95% CI)         | n          | % (95% CI)           | n          | % (95% CI)           | n             | % (95% CI)           |
| <b>Year of Birth</b>                      |                        |                      |                    |                    |            |                      |            |                      |               |                      |
| <b>1939 – 44<br/>N=20,042</b>             | 2529                   | 12.6<br>(12.2, 13.1) | 1482               | 7.4<br>(7.0, 7.8)  | 4011       | 20.0<br>(19.5, 20.6) | 6884       | 34.4<br>(32.7, 35.0) | 9147          | 45.6<br>(45.0, 46.3) |
| <b>Sex</b>                                |                        |                      |                    |                    |            |                      |            |                      |               |                      |
| Female                                    | 1284                   | 12.8<br>(12.2, 13.5) | 605                | 6.0<br>(5.6, 13.5) | 1889       | 18.9<br>(18.1, 19.6) | 3198       | 31.9<br>(31.0, 32.8) | 4929          | 49.2<br>(48.2, 50.2) |
| Male                                      | 1245                   | 12.4<br>(11.8, 13.1) | 877                | 8.8<br>(8.2, 9.3)  | 2122       | 21.2<br>(20.4, 22.0) | 3686       | 36.8<br>(35.8, 37.7) | 4218          | 42.1<br>(41.1, 43.0) |
| <b>Highest educational qualification¥</b> |                        |                      |                    |                    |            |                      |            |                      |               |                      |
| None                                      | 382                    | 6.7<br>(6.1, 7.4)    | 288                | 5.1<br>(4.5, 5.6)  | 670        | 11.7<br>(10.9, 12.6) | 2022       | 35.4<br>(34.2, 36.7) | 3014          | 52.8<br>(51.5, 54.1) |
| O-level                                   | 558                    | 12.5<br>(11.6, 13.5) | 367                | 8.2<br>(7.4, 9.1)  | 925        | 20.7<br>(19.5, 21.9) | 1475       | 33.0<br>(31.7, 34.4) | 2066          | 46.3<br>(44.8, 47.7) |
| A-level                                   | 383                    | 12.7<br>(11.6, 14.0) | 250                | 8.3<br>(7.4, 9.4)  | 633        | 21.1<br>(19.6, 22.6) | 1073       | 35.7<br>(34.0, 37.4) | 1300          | 43.3<br>(41.5, 45.0) |
| Higher-level                              | 1193                   | 18.2<br>(17.3, 19.2) | 562                | 8.6<br>(7.9, 9.3)  | 1755       | 26.8<br>(25.7, 27.9) | 2200       | 33.6<br>(32.4, 34.7) | 2598          | 39.7<br>(38.5, 40.8) |
| Missing                                   | 13                     | -                    | 15                 | -                  | 28         | -                    | 114        | -                    | 169           | -                    |
| <b>Accommodation tenure</b>               |                        |                      |                    |                    |            |                      |            |                      |               |                      |
| Rent from council                         | 98                     | 9.4<br>(7.8, 11.3)   | 70                 | 6.7<br>(5.3, 8.4)  | 168        | 16.1<br>(14.0, 18.5) | 353        | 33.9<br>(31.0, 36.8) | 521           | 50.0<br>(47.1, 53.0) |
| Rent from private                         | 30                     | 7.8<br>(5.5, 10.9)   | 19                 | 4.9<br>(3.9, 7.6)  | 49         | 12.4<br>(9.7, 16.4)  | 140        | 36.2<br>(31.5, 41.1) | 198           | 51.2<br>(46.2, 56.1) |
| Own with mortgage                         | 214                    | 11.7<br>(10.3, 13.3) | 148                | 8.1<br>(6.9, 9.5)  | 362        | 19.9<br>(18.1, 21.7) | 624        | 34.2<br>(32.1, 36.4) | 838           | 45.9<br>(43.7, 48.2) |
| Own outright                              | 2156                   | 13.2<br>(12.6, 13.7) | 1213               | 7.4<br>(7.0, 7.8)  | 3369       | 20.6<br>(19.9, 21.1) | 5625       | 34.4<br>(33.6, 35.1) | 7392          | 45.1<br>(44.1, 45.8) |
| Missing                                   | 31                     | -                    | 32                 | -                  | 63         | -                    | 132        | -                    | 198           | -                    |
| <b>Ethnicity</b>                          |                        |                      |                    |                    |            |                      |            |                      |               |                      |
| White                                     | 2432                   | 12.9                 | 1387               | 7.4                | 3819       | 20.2                 | 6410       | 34.0                 | 8638          | 45.8                 |

|                         |    |                      |    |                     |    |                      |     |                      |     |                      |
|-------------------------|----|----------------------|----|---------------------|----|----------------------|-----|----------------------|-----|----------------------|
|                         |    | (12.4, 13.4)         |    | (7.0, 7.7)          |    | (19.7, 20.8)         |     | (33.8, 34.7)         |     | (45.1, 46.5)         |
| Mixed ethnicity         | 6  | 6.7<br>(3.0, 13.3)   | 7  | 7.9<br>(3.7, 15.8)  | 13 | 14.6<br>(8.6, 23.8)  | 38  | 42.7<br>(32.7, 53.3) | 38  | 42.9<br>(32.7, 53.3) |
| Asian or Asian British§ | 38 | 8.7<br>(6.4, 11.7)   | 35 | 8.0<br>(5.8, 11.0)  | 73 | 10.7<br>(13.5, 20.5) | 185 | 42.3<br>(37.8, 47.0) | 179 | 41.0<br>(36.5, 45.7) |
| Black or Black British  | 10 | 3.1<br>(1.7, 5.7)    | 27 | 8.5<br>(5.9, 12.1)  | 37 | 11.6<br>(8.5, 15.6)  | 128 | 40.1<br>(34.9, 45.6) | 154 | 48.3<br>(42.8, 53.8) |
| Chinese                 | 13 | 27.1<br>(16.1, 41.8) | 3  | 6.3<br>(2.0, 18.0)  | 16 | 33.3<br>(21.2, 48.2) | 19  | 39.6<br>(26.4, 54.4) | 13  | 27.1<br>(16.1, 41.8) |
| Other                   | 12 | 8.2<br>(4.7, 13.9)   | 16 | 10.9<br>(6.7, 17.1) | 28 | 19.1<br>(13.4, 26.3) | 58  | 39.5<br>(31.8, 47.7) | 61  | 41.5<br>(33.7, 48.7) |
| <i>Missing</i>          | 18 | -                    | 7  | -                   | 25 | -                    | 46  | -                    | 64  | -                    |

¥O level: State examination at age 16 years; A level: State examination at age 18 years. §Asian category includes Indian, Pakistani and Bangladeshi

| Factor                                    | Childhood-onset myopia |                      | Adult-onset myopia |                      | All myopia |                      | Emmetropia |                      | Hypermetropia |                      |
|-------------------------------------------|------------------------|----------------------|--------------------|----------------------|------------|----------------------|------------|----------------------|---------------|----------------------|
|                                           | n                      | % (95% CI)           | n                  | % (95% CI)           | n          | % (95% CI)           | n          | % (95% CI)           | n             | % (95% CI)           |
| <b>Year of Birth</b>                      |                        |                      |                    |                      |            |                      |            |                      |               |                      |
| <b>1944-49</b><br><b>N=26,963</b>         | 4219                   | 15.6<br>(15.2, 16.1) | 2473               | 9.2<br>(8.8, 9.35)   | 6692       | 24.8<br>(24.3, 25.3) | 10,353     | 33.4<br>(37.8, 39.0) | 9918          | 36.8<br>(36.2, 37.4) |
| <b>Sex</b>                                |                        |                      |                    |                      |            |                      |            |                      |               |                      |
| Female                                    | 2373                   | 16.3<br>(15.7, 16.9) | 1137               | 7.8<br>(9.4, 8.3)    | 3510       | 24.1<br>(23.4, 24.8) | 5339       | 36.7<br>(35.9, 37.5) | 5704          | 39.2<br>(38.4, 40.0) |
| Male                                      | 1846                   | 14.9<br>(14.3, 15.5) | 1336               | 10.8<br>(10.2, 11.3) | 3182       | 25.6<br>(24.9, 26.4) | 5014       | 40.4<br>(39.5, 41.2) | 4214          | 34.0<br>(33.1, 34.8) |
| <b>Highest educational qualification‡</b> |                        |                      |                    |                      |            |                      |            |                      |               |                      |
| None                                      | 353                    | 6.8<br>(6.1, 7.5)    | 344                | 6.6<br>(5.9, 7.3)    | 697        | 13.4<br>(12.5, 14.3) | 2136       | 40.9<br>(39.6, 42.3) | 2387          | 45.7<br>(44.4, 47.1) |
| O-level                                   | 901                    | 14.2<br>(13.3, 15.1) | 633                | 10.1<br>(9.2, 10.7)  | 1534       | 24.1<br>(23.1, 25.2) | 2491       | 39.2<br>(38.0, 40.4) | 2332          | 36.7<br>(35.5, 37.9) |
| A-level                                   | 719                    | 15.1<br>(14.1, 16.1) | 450                | 9.4<br>(8.6, 10.3)   | 1169       | 24.5<br>(23.3, 25.3) | 1845       | 38.7<br>(37.3, 40.0) | 1756          | 36.8<br>(35.5, 38.2) |
| Higher-level                              | 2217                   | 21.6<br>(20.8, 22.4) | 1014               | 9.9<br>(9.3, 10.4)   | 3231       | 31.4<br>(30.5, 32.3) | 3753       | 36.5<br>(35.6, 37.4) | 3303          | 32.1<br>(31.2, 33.0) |
| <i>Missing</i>                            | 29                     | -                    | 32                 | -                    | 61         | -                    | 128        | -                    | 140           | -                    |
| <b>Accommodation tenure</b>               |                        |                      |                    |                      |            |                      |            |                      |               |                      |
| Rent from council                         | 164                    | 11.5<br>(10.0, 13.3) | 95                 | 6.7<br>(5.5, 8.1)    | 259        | 18.2<br>(16.3, 20.3) | 535        | 37.7<br>(35.2, 40.2) | 629           | 44.1<br>(41.6, 46.7) |
| Rent from private                         | 83                     | 13.5<br>(11.0, 16.5) | 51                 | 8.3<br>(6.4, 10.8)   | 134        | 21.8<br>(18.7, 25.3) | 229        | 37.3<br>(33.5, 41.2) | 251           | 40.9<br>(37.0, 44.8) |
| Own with mortgage                         | 721                    | 14.6<br>(13.7, 15.6) | 484                | 9.8<br>(9.0, 10.7)   | 1205       | 24.4<br>(23.3, 25.7) | 1939       | 39.3<br>(38.0, 40.7) | 1787          | 36.2<br>(34.9, 37.6) |
| Own outright                              | 3205                   | 16.4<br>(15.9, 16.9) | 1798               | 9.2<br>(8.8, 9.6)    | 5003       | 23.6<br>(25.0, 26.2) | 7471       | 38.2<br>(37.5, 38.9) | 7083          | 36.2<br>(35.5, 36.9) |
| <i>Missing</i>                            | 46                     | -                    | 45                 | -                    | 91         | -                    | 179        | -                    | 170           | -                    |
| <b>Ethnicity</b>                          |                        |                      |                    |                      |            |                      |            |                      |               |                      |
| White                                     | 4042                   | 16.0<br>(15.5, 16.4) | 2294               | 9.1<br>(8.9, 9.4)    | 6336       | 25.0<br>(25.5, 25.6) | 9681       | 38.2<br>(37.6, 38.8) | 9313          | 36.8<br>(36.2, 37.4) |
| Mixed ethnicity                           | 24                     | 20.9<br>(14.3, 29.3) | 11                 | 9.6<br>(5.3, 16.6)   | 35         | 30.4<br>(22.6, 39.6) | 40         | 34.8<br>(26.5, 44.1) | 40            | 34.8<br>(26.5, 44.1) |

|                         |    |                      |    |                     |     |                      |     |                      |     |                      |
|-------------------------|----|----------------------|----|---------------------|-----|----------------------|-----|----------------------|-----|----------------------|
| Asian or Asian British§ | 71 | 11.4<br>(9.1, 14.2)  | 75 | 12.1<br>(9.7, 14.9) | 146 | 23.5<br>(20.3, 27.0) | 258 | 41.5<br>(37.7, 45.4) | 218 | 35.1<br>(31.4, 38.9) |
| Black or Black British  | 22 | 5.5<br>(3.6, 8.2)    | 42 | 10.4<br>(7.8, 13.8) | 64  | 15.8<br>(12.6, 19.8) | 169 | 41.9<br>(37.2, 46.8) | 170 | 42.2<br>(37.4, 47.0) |
| Chinese                 | 19 | 25.3<br>(16.6, 36.6) | 8  | 10.7<br>(5.3, 20.2) | 27  | 36.0<br>(25.8, 47.9) | 31  | 41.3<br>(30.6, 53.0) | 17  | 22.7<br>(14.4, 33.8) |
| Other                   | 21 | 8.8<br>(5.8, 13.1)   | 24 | 10.0<br>(6.8, 14.6) | 45  | 18.8<br>(14.3, 24.3) | 98  | 41.0<br>(34.9, 47.4) | 96  | 40.2<br>(34.1, 46.6) |
| Missing                 | 20 | -                    | 19 | -                   | 39  | -                    | 76  | -                    | 64  | -                    |

¥O level: State examination at age 16 years; A level: State examination at age 18 years. §Asian category includes Indian, Pakistani and Bangladeshi

| Factor                                    | Childhood-onset myopia |              | Adult-onset myopia |              | All myopia |              | Emmetropia |              | Hypermetropia |              |
|-------------------------------------------|------------------------|--------------|--------------------|--------------|------------|--------------|------------|--------------|---------------|--------------|
|                                           | n                      | % (95% CI)   | n                  | % (95% CI)   | n          | % (95% CI)   | n          | % (95% CI)   | n             | % (95% CI)   |
| <b>Year of Birth</b>                      |                        |              |                    |              |            |              |            |              |               |              |
| <b>1950-54</b>                            | 3378                   | 17.8         | 2207               | 11.6         | 5585       | 29           | 8418       | 44.3         | 4915          | 26.3         |
| <b>N=18,998</b>                           |                        | (17.2, 18.3) |                    | (11.2, 12.1) |            | (28.8, 30.0) |            | (43.6, 45.0) |               | (25.7, 27.0) |
| <b>Sex</b>                                |                        |              |                    |              |            |              |            |              |               |              |
| Female                                    | 1966                   | 18.5         | 1107               | 10.4         | 3073       | 28.8         | 4630       | 43.5         | 2951          | 27.7         |
|                                           |                        | (17.7, 19.2) |                    | (9.8, 11.0)  |            | (28.0, 29.9) |            | (42.5, 44.4) |               | (26.9, 28.6) |
| Male                                      | 1412                   | 16.9         | 1100               | 13.2         | 2512       | 30.1         | 3788       | 45.4         | 2044          | 24.5         |
|                                           |                        | (16.4, 17.7) |                    | (12.5, 13.9) |            | (29.1, 31.1) |            | (44.3, 46.5) |               | (23.6, 25.4) |
| <b>Highest educational qualification‡</b> |                        |              |                    |              |            |              |            |              |               |              |
| None                                      | 137                    | 6.1          | 188                | 8.4          | 325        | 14.5         | 1123       | 50.0         | 800           | 35.6         |
|                                           |                        | (5.2, 7.2)   |                    | (7.3, 9.6)   |            | (13.1, 16.0) |            | (47.9, 52.0) |               | (33.6, 37.6) |
| O-level                                   | 643                    | 13.6         | 575                | 12.1         | 1218       | 25.7         | 2226       | 46.9         | 1303          | 27.5         |
|                                           |                        | (12.6, 14.5) |                    | (11.2, 13.1) |            | (24.4, 24.9) |            | (45.5, 48.3) |               | (26.2, 28.7) |
| A-level                                   | 578                    | 16.1         | 413                | 11.5         | 991        | 27.6         | 1632       | 27.5         | 969           | 27.0         |
|                                           |                        | (14.9, 17.3) |                    | (10.5, 12.6) |            | (26.2, 29.1) |            | (43.8, 47.1) |               | (25.5, 28.5) |
| Higher-level                              | 2003                   | 24.4         | 1005               | 12.3         | 3008       | 36.8         | 3330       | 40.7         | 1840          | 22.5         |
|                                           |                        | (23.6, 25.4) |                    | (11.6, 13.0) |            | (35.9, 37.8) |            | (39.7, 41.8) |               | (21.6, 23.4) |
| Missing                                   | 17                     | -            | 26                 | -            | 43         | -            | 107        | -            | 83            | -            |
| <b>Accommodation tenure</b>               |                        |              |                    |              |            |              |            |              |               |              |
| Rent from council                         | 149                    | 11.9         | 114                | 9.1          | 263        | 21.0         | 579        | 46.2         | 411           | 32.8         |
|                                           |                        | (10.2, 13.8) |                    | (7.6, 10.8)  |            | (18.8, 23.3) |            | (43.5, 49.0) |               | (30.3, 35.5) |
| Rent from private                         | 81                     | 13.5         | 61                 | 10.1         | 142        | 23.6         | 289        | 48.0         | 171           | 28.4         |
|                                           |                        | (10.9, 16.4) |                    | (9.8, 12.8)  |            | (20.4, 27.2) |            | (44.0, 52.0) |               | (24.9, 32.2) |
| Own with mortgage                         | 1100                   | 16.6         | 801                | 12.1         | 1901       | 28.7         | 2993       | 45.3         | 1720          | 26.0         |
|                                           |                        | (15.8, 17.5) |                    | (11.3, 12.9) |            | (27.7, 29.8) |            | (44.0, 46.5) |               | (25.0, 27.1) |
| Own outright                              | 2006                   | 19.7         | 1194               | 11.7         | 3200       | 31.4         | 4408       | 43.2         | 2599          | 25.5         |
|                                           |                        | (18.9, 30.4) |                    | (11.1, 12.3) |            | (30.5, 32.3) |            | (42.2, 44.1) |               | (24.6, 26.3) |
| Missing                                   | 42                     | -            | 37                 | -            | 79         | -            | 149        | -            | 94            | -            |
| <b>Ethnicity</b>                          |                        |              |                    |              |            |              |            |              |               |              |
| White                                     | 3123                   | 18.3         | 1985               | 11.6         | 5108       | 29.9         | 7522       | 44.0         | 4454          | 26.1         |
|                                           |                        | (17.7, 18.9) |                    | (11.1, 12.1) |            | (29.2, 30.6) |            | (43.3, 44.8) |               | (25.4, 26.7) |
| Mixed ethnicity                           | 29                     | 20.7         | 15                 | 10.7         | 44         | 31.4         | 64         | 45.7         | 32            | 22.9         |
|                                           |                        | (14.7, 28.3) |                    | (6.5, 17.1)  |            | (24.2, 39.7) |            | (37.6, 54.1) |               | (16.6, 30.6) |

|                         |    |                      |    |                     |     |                      |     |                      |     |                      |
|-------------------------|----|----------------------|----|---------------------|-----|----------------------|-----|----------------------|-----|----------------------|
| Asian or Asian British§ | 86 | 12.0<br>(9.8, 14.6)  | 85 | 11.8<br>(9.7, 14.4) | 171 | 23.8<br>(20.8, 27.0) | 324 | 45.1<br>(41.4, 48.7) | 224 | 31.2<br>(27.9, 34.6) |
| Black or Black British  | 40 | 7.4<br>(5.5, 10.0)   | 62 | 11.5<br>(9.1, 14.5) | 102 | 19.0<br>(15.8, 22.5) | 279 | 52.0<br>(47.7, 56.2) | 156 | 29.1<br>(25.4, 33.0) |
| Chinese                 | 49 | 43.7<br>(34.7, 53.2) | 11 | 9.8<br>(5.5, 17.0)  | 60  | 53.6<br>(44.2, 62.7) | 41  | 36.6<br>(28.1, 46.0) | 11  | 9.8<br>(5.5, 17.0)   |
| Other                   | 33 | 11.5<br>(8.3, 15.8)  | 37 | 12.9<br>(9.5, 17.4) | 70  | 24.5<br>(19.8, 29.8) | 132 | 46.2<br>(40.4, 52.0) | 84  | 29.4<br>(24.4, 34.9) |
| <i>Missing</i>          | 18 | -                    | 12 | -                   | 30  | -                    | 56  | -                    | 34  | -                    |

¥O level: State examination at age 16 years; A level: State examination at age 18 years. §Asian category includes Indian, Pakistani and Bangladeshi

| Factor                                    | Childhood-onset myopia |                      | Adult-onset myopia |                      | All myopia |                      | Emmetropia |                      | Hypermetropia |                      |
|-------------------------------------------|------------------------|----------------------|--------------------|----------------------|------------|----------------------|------------|----------------------|---------------|----------------------|
|                                           | n                      | % (95% CI)           | n                  | % (95% CI)           | n          | % (95% CI)           | n          | % (95% CI)           | n             | % (95% CI)           |
| <b>Year of Birth</b>                      |                        |                      |                    |                      |            |                      |            |                      |               |                      |
| <b>1955-59</b>                            | 2722                   | 16.9<br>(16.3, 17.5) | 2263               | 14.0<br>(13.5, 14.6) | 4985       | 30.9<br>(30.2, 31.6) | 8081       | 90.1<br>(49.3, 50.8) | 3073          | 19.0<br>(18.4, 19.7) |
| <b>N=16,139</b>                           |                        |                      |                    |                      |            |                      |            |                      |               |                      |
| <b>Sex</b>                                |                        |                      |                    |                      |            |                      |            |                      |               |                      |
| Female                                    | 1683                   | 18.2<br>(17.4, 19.0) | 1213               | 15.1<br>(12.4, 13.8) | 2896       | 31.3<br>(30.4, 32.3) | 4500       | 48.7<br>(47.7, 49.7) | 1848          | 20<br>(19.2, 20.8)   |
| Male                                      | 1039                   | 13.1<br>(14.2, 15.9) | 1050               | 15.2<br>(14.4, 16.1) | 2089       | 30.3<br>(29.2, 31.4) | 3581       | 51.9<br>(50.8, 53.1) | 1225          | 17.8<br>(16.9, 18.7) |
| <b>Highest educational qualification‡</b> |                        |                      |                    |                      |            |                      |            |                      |               |                      |
| None                                      | 75                     | 5.7<br>(4.5, 7.1)    | 121                | 9.2<br>(7.7, 10.8)   | 196        | 14.8<br>(13.0, 16.8) | 757        | 57.3<br>(54.6, 60.0) | 369           | 27.9<br>(25.6, 30.4) |
| O-level                                   | 559                    | 11.8<br>(10.9, 12.8) | 704                | 14.9<br>(13.9, 15.9) | 1263       | 26.7<br>(25.5, 28.0) | 2487       | 52.6<br>(51.1, 54.0) | 981           | 20.7<br>(19.6, 21.9) |
| A-level                                   | 495                    | 15.7<br>(14.5, 17.1) | 459                | 14.6<br>(13.4, 15.8) | 954        | 30.3<br>(28.7, 31.9) | 1619       | 51.4<br>(50.0, 53.2) | 576           | 18.3<br>(17.0, 20.0) |
| Higher-level                              | 1583                   | 23.4<br>(22.4, 24.4) | 968                | 14.3<br>(13.5, 15.2) | 2551       | 37.7<br>(36.6, 38.9) | 3116       | 46.1<br>(44.9, 47.3) | 1092          | 16.2<br>(15.3, 17.1) |
| Missing                                   | 10                     | -                    | 11                 | -                    | 21         | -                    | 102        | -                    | 55            | -                    |
| <b>Accommodation tenure</b>               |                        |                      |                    |                      |            |                      |            |                      |               |                      |
| Rent from council                         | 121                    | 9.6<br>(8.1, 11.4)   | 134                | 10.7<br>(9.1, 12.5)  | 255        | 20.3<br>(18.2, 32.6) | 691        | 55.1<br>(52.3, 57.8) | 309           | 24.6<br>(22.3, 27.1) |
| Rent from private                         | 107                    | 14.0<br>(11.7, 16.6) | 96                 | 12.6<br>(10.4, 15.1) | 203        | 26.5<br>(23.5, 29.8) | 395        | 51.6<br>(48.4, 55.2) | 167           | 21.8<br>(19.0, 24.9) |
| Own with mortgage                         | 1326                   | 15.8<br>(15.0, 16.6) | 1235               | 14.7<br>(14.0, 15.5) | 2561       | 30.5<br>(29.5, 31.5) | 4259       | 50.7<br>(49.7, 51.8) | 1575          | 18.8<br>(17.9, 19.6) |
| Own outright                              | 1133                   | 20.9<br>(19.8, 22.0) | 767                | 14.1<br>(13.2, 15.1) | 1900       | 35.0<br>(34.7, 36.3) | 257        | 47.5<br>(46.1, 48.8) | 956           | 17.6<br>(16.6, 18.6) |
| Missing                                   | 35                     | -                    | 31                 | -                    | 66         | -                    | 159        | -                    | 68            | -                    |
| <b>Ethnicity</b>                          |                        |                      |                    |                      |            |                      |            |                      |               |                      |
| White                                     | 2393                   | 17.2<br>(16.6, 17.8) | 1990               | 14.3<br>(13.7, 14.9) | 4383       | 31.5<br>(30.7, 32.2) | 6881       | 49.4<br>(48.6, 50.2) | 2662          | 19.1<br>(18.5, 19.8) |
| Mixed ethnicity                           | 36                     | 19.2<br>(14.1, 25.5) | 19                 | 10.1<br>(6.5, 15.4)  | 55         | 29.3<br>(23.1, 36.2) | 103        | 54.8<br>(47.6, 61.8) | 3             | 16.0<br>(11.4, 22.0) |

|                         |     |                      |     |                      |     |                      |     |                      |     |                      |
|-------------------------|-----|----------------------|-----|----------------------|-----|----------------------|-----|----------------------|-----|----------------------|
| Asian or Asian British§ | 119 | 16.5<br>(13.9, 19.4) | 81  | 11.2<br>(9.1, 13.7)  | 200 | 27.7<br>(24.5, 31.0) | 393 | 54.4<br>(50.7, 58.0) | 130 | 18.0<br>(15.3, 21.0) |
| Black or Black British  | 99  | 12.3<br>(10.2, 14.8) | 113 | 14.0<br>(11.8, 16.6) | 212 | 26.3<br>(23.4, 29.5) | 442 | 54.9<br>(51.4, 58.3) | 151 | 18.8<br>(16.2, 21.6) |
| White                   | 25  | 27.8<br>(19.4, 38.1) | 15  | 16.7<br>(10.2, 26.0) | 40  | 44.4<br>(34.4, 55.0) | 43  | 47.8<br>(37.5, 58.2) | 7   | 7.8<br>(3.7, 15.6)   |
| Other                   | 38  | 12.8<br>(9.4, 17.1)  | 30  | 10.1<br>(7.1, 14.1)  | 68  | 22.8<br>(18.4, 28.0) | 165 | 55.4<br>(49.6, 60.1) | 65  | 21.8<br>(17.5, 26.9) |
| Missing                 | 12  | -                    | 15  | -                    | 27  | -                    | 54  | -                    | 28  | -                    |

¥O level: State examination at age 16 years; A level: State examination at age 18 years. §Asian category includes Indian, Pakistani and Bangladeshi



| Factor                                    | Childhood-onset myopia |                      | Adult-onset myopia |                      | All myopia |                      | Emmetropia |                      | Hypermetrop |                      |
|-------------------------------------------|------------------------|----------------------|--------------------|----------------------|------------|----------------------|------------|----------------------|-------------|----------------------|
|                                           | n                      | % (95% CI)           | n                  | % (95% CI)           | n          | % (95% CI)           | n          | % (95% CI)           | n           | % (95% CI)           |
| <b>Year of Birth</b>                      |                        |                      |                    |                      |            |                      |            |                      |             |                      |
| <b>1960-64</b><br><b>N=14,010</b>         | 2182                   | 15.6<br>(15.0, 16.2) | 2104               | 15.0<br>(14.4, 15.6) | 4286       | 30.6<br>(29.8, 31.4) | 8071       | 57.6<br>(56.8, 58.4) | 1653        | 11.8<br>(11.3, 12.3) |
| <b>Sex</b>                                |                        |                      |                    |                      |            |                      |            |                      |             |                      |
| Female                                    | 1336                   | 17.0<br>(16.2, 17.8) | 1145               | 14.5<br>(13.8, 15.3) | 2481       | 31.5<br>(30.5, 32.5) | 4395       | 55.8<br>(54.7, 56.9) | 997         | 12.7<br>(11.9, 13.4) |
| Male                                      | 846                    | 13.8<br>(12.9, 14.7) | 959                | 15.6<br>(14.7, 16.6) | 1805       | 29.4<br>(28.3, 30.6) | 3676       | 59.9<br>(58.7, 61.1) | 656         | 10.7<br>(9.9, 11.5)  |
| <b>Highest educational qualification‡</b> |                        |                      |                    |                      |            |                      |            |                      |             |                      |
| None                                      | 44                     | 5.7<br>(4.3, 7.6)    | 71                 | 9.2<br>(7.4, 11.5)   | 115        | 14.9<br>(12.6, 17.6) | 520        | 67.5<br>(64.1, 70.8) | 135         | 17.5<br>(15.0, 20.4) |
| O-level                                   | 485                    | 10.6<br>(9.8, 11.5)  | 641                | 14.0<br>(13.0, 15.1) | 112        | 24.6<br>(23.4, 25.9) | 2846       | 62.3<br>(60.8, 63.7) | 2578        | 13.1<br>(12.1, 14.1) |
| A-level                                   | 393                    | 15.1<br>(13.7, 16.5) | 399                | 15.3<br>(14.0, 16.7) | 792        | 30.3<br>(28.6, 32.1) | 1502       | 57.5<br>(55.6, 59.4) | 317         | 12.1<br>(10.9, 13.5) |
| Higher-level                              | 1250                   | 21.3<br>(20.3, 22.4) | 968                | 16.5<br>(15.6, 17.5) | 2218       | 37.9<br>(36.6, 39.1) | 3075       | 52.5<br>(51.2, 53.8) | 565         | 9.6<br>(8.9, 10.4)   |
| <i>Missing</i>                            | 10                     | -                    | 25                 | -                    | 35         | -                    | 128        | -                    | 38          | -                    |
| <b>Accommodation tenure</b>               |                        |                      |                    |                      |            |                      |            |                      |             |                      |
| Rent from council                         | 131                    | 10.2<br>(8.7, 12.0)  | 132                | 10.3<br>(8.7, 12.1)  | 263        | 20.5<br>(18.4, 22.8) | 831        | 64.7<br>(62.1, 67.3) | 190         | 14.8<br>(13.0, 16.8) |
| Rent from private                         | 103                    | 11.9<br>(9.9, 14.2)  | 108                | 12.4<br>(10.4, 14.8) | 211        | 24.3<br>(21.5, 27.2) | 534        | 61.5<br>(58.2, 64.6) | 124         | 14.3<br>(12.1, 16.8) |
| Own with mortgage                         | 1418                   | 16.3<br>(15.5, 17.1) | 1333               | 15.3<br>(14.6, 16.1) | 2751       | 31.6<br>(30.7, 32.6) | 4971       | 57.2<br>(56.1, 58.2) | 974         | 11.2<br>(10.6, 11.9) |
| Own outright                              | 480                    | 17.0<br>(16.7, 18.5) | 472                | 16.8<br>(15.4, 18.2) | 952        | 33.8<br>(32.1, 35.6) | 1552       | 55.1<br>(53.3, 56.9) | 313         | 11.1<br>(10.0, 12.3) |
| <i>Missing</i>                            | 50                     | -                    | 59                 | -                    | 109        | -                    | 183        | -                    | 52          | -                    |
| <b>Ethnicity</b>                          |                        |                      |                    |                      |            |                      |            |                      |             |                      |
| White                                     | 1827                   | 15.8<br>(15.1, 16.5) | 1760               | 15.2<br>(14.6, 15.9) | 3587       | 31.0<br>(30.1, 31.8) | 6568       | 56.7<br>(55.8, 57.6) | 1423        | 12.3<br>(11.7, 12.9) |
| Mixed ethnicity                           | 38                     | 15.3<br>(11.3, 20.4) | 39                 | 15.7<br>(11.7, 20.8) | 77         | 31.1<br>(25.6, 37.1) | 149        | 60.1<br>(53.8, 66.0) | 22          | 8.9<br>(5.9, 13.1)   |

|                         |     |                      |     |                      |     |                      |     |                      |    |                     |
|-------------------------|-----|----------------------|-----|----------------------|-----|----------------------|-----|----------------------|----|---------------------|
| Asian or Asian British§ | 99  | 14.0<br>(11.6, 16.7) | 95  | 13.4<br>(11.8, 16.3) | 194 | 27.4<br>(24.2, 30.8) | 446 | 62.9<br>(59.3, 66.4) | 69 | 9.7<br>(7.8, 12.1)  |
| Black or Black British  | 136 | 14.7<br>(12.5, 17.1) | 129 | 13.9<br>(11.8, 16.3) | 265 | 28.6<br>(25.8, 31.0) | 585 | 63.2<br>(60.0, 66.2) | 76 | 8.2<br>(6.6, 10.2)  |
| Chinese                 | 36  | 39.1<br>(29.6, 50.0) | 20  | 21.7<br>(14.4, 31.5) | 56  | 60.9<br>(50.4, 70.2) | 32  | 34.8<br>(25.6, 45.2) | 4  | 4.4<br>(1.6, 11.2)  |
| Other                   | 29  | 8.8<br>(6.2, 12.4)   | 42  | 12.8<br>(9.6, 16.8)  | 71  | 21.6<br>(17.4, 26.4) | 215 | 65.4<br>(60.0, 70.3) | 43 | 13.1<br>(9.8, 17.2) |
| Missing                 | 17  | -                    | 19  | -                    | 36  | -                    | 76  | -                    | 16 | -                   |

¥O level: State examination at age 16 years; A level: State examination at age 18 years. §Asian category includes Indian, Pakistani and Bangladeshi

| Factor                                    | Childhood-onset myopia |                      | Adult-onset myopia |                      | All myopia |                      | Emmetropia |                      | Hypermetrop |                     |
|-------------------------------------------|------------------------|----------------------|--------------------|----------------------|------------|----------------------|------------|----------------------|-------------|---------------------|
|                                           | n                      | % (95% CI)           | n                  | % (95% CI)           | n          | % (95% CI)           | n          | % (95% CI)           | n           | % (95% CI)          |
| <b>Year of Birth</b>                      |                        |                      |                    |                      |            |                      |            |                      |             |                     |
| <b>1965-69</b>                            | 1756                   | 15.6<br>(14.9, 16.2) | 1537               | 13.6<br>(13.0, 14.3) | 3293       | 29.2<br>(28.3, 30.0) | 7153       | 63.4<br>(62.5, 64.2) | 844         | 7.5<br>(7.0, 8.0)   |
| <b>N=11,290</b>                           |                        |                      |                    |                      |            |                      |            |                      |             |                     |
| <b>Sex</b>                                |                        |                      |                    |                      |            |                      |            |                      |             |                     |
| Female                                    | 1047                   | 17.2<br>(16.2, 18.1) | 841                | 3.8<br>(12.9, 14.7)  | 1888       | 30.9<br>(29.8, 32.1) | 3761       | 61.6<br>(60.4, 62.8) | 456         | 7.5<br>(6.8, 8.2)   |
| Male                                      | 709                    | 13.9<br>(13.8, 14.6) | 696                | 13.4<br>(12.5, 14.4) | 1405       | 27.1<br>(25.9, 28.3) | 3392       | 65.4<br>(64.1, 66.7) | 388         | 7.5<br>(6.8, 8.2)   |
| <b>Highest educational qualification‡</b> |                        |                      |                    |                      |            |                      |            |                      |             |                     |
| None                                      | 18                     | 3.5<br>(2.2, 5.5)    | 42                 | 8.2<br>(6.1, 11.0)   | 60         | 11.8<br>(9.2, 14.9)  | 393        | 77.1<br>(73.2, 80.5) | 57          | 11.2<br>(8.9, 14.2) |
| O-level                                   | 354                    | 10.4<br>(9.4, 11.5)  | 424                | 12.5<br>(11.4, 13.6) | 778        | 22.9<br>(21.5, 24.3) | 2324       | 68.3<br>(66.7, 69.9) | 299         | 8.8<br>(7.9, 9.8)   |
| A-level                                   | 286                    | 14.1<br>(12.6, 15.6) | 277                | 13.6<br>(12.2, 15.2) | 563        | 27.7<br>(25.8, 29.7) | 1303       | 64.1<br>(62.0, 66.2) | 167         | 8.2<br>(7.1, 9.5)   |
| Higher-level                              | 1083                   | 21.1<br>(20.0, 22.2) | 775                | 15.1<br>(14.1, 16.1) | 1858       | 36.2<br>(34.9, 37.5) | 2972       | 57.9<br>(56.6, 59.3) | 302         | 5.9<br>(5.3, 6.6)   |
| <i>Missing</i>                            | 15                     | -                    | 19                 | -                    | 34         | -                    | 161        | -                    | 19          | -                   |
| <b>Accommodation tenure</b>               |                        |                      |                    |                      |            |                      |            |                      |             |                     |
| Rent from council                         | 119                    | 11.4<br>(9.6, 13.5)  | 97                 | 9.3<br>(7.7, 11.2)   | 216        | 20.7<br>(18.3, 23.3) | 731        | 70.0<br>(67.2, 72.7) | 97          | 9.3<br>(7.7, 8.2)   |
| Rent from private                         | 167                    | 15.0<br>(13.0, 17.2) | 120                | 10.8<br>(9.1, 12.7)  | 287        | 25.8<br>(23.3, 28.4) | 741        | 66.5<br>(63.7, 69.2) | 86          | 7.7<br>(6.3, 9.4)   |
| Own with mortgage                         | 1158                   | 15.7<br>(14.9, 13.5) | 1043               | 14.1<br>(13.3, 14.9) | 2201       | 29.8<br>(28.7, 30.8) | 4655       | 63.0<br>(61.9, 64.1) | 537         | 7.3<br>(6.7, 7.9)   |
| Own outright                              | 271                    | 19.0<br>(17.0, 21.1) | 240                | 16.8<br>(14.9, 18.8) | 511        | 35.8<br>(33.3, 38.3) | 815        | 57.0<br>(54.4, 59.6) | 103         | 7.2<br>(6.0, 8.7)   |
| <i>Missing</i>                            | 41                     | -                    | 37                 | -                    | 78         | -                    | 211        | -                    | 21          | -                   |
| <b>Ethnicity</b>                          |                        |                      |                    |                      |            |                      |            |                      |             |                     |
| White                                     | 1440                   | 16.0<br>(15.3, 16.8) | 1243               | 13.8<br>(13.1, 14.5) | 2683       | 29.8<br>(28.9, 30.8) | 5563       | 61.8<br>(60.8, 62.8) | 752         | 8.4<br>(7.8, 6.8)   |
| Mixed ethnicity                           | 35                     | 18.0<br>(13.8, 24.2) | 31                 | 16.0<br>(11.4, 21.9) | 66         | 34.0<br>(27.6, 41.0) | 122        | 62.9<br>(55.8, 69.4) | 6           | 3.1<br>(1.4, 6.8)   |

|                         |     |                      |     |                      |     |                      |     |                      |    |                   |
|-------------------------|-----|----------------------|-----|----------------------|-----|----------------------|-----|----------------------|----|-------------------|
| Asian or Asian British§ | 115 | 14.0<br>(11.8, 16.5) | 101 | 12.3<br>(10.2, 14.7) | 216 | 26.3<br>(23.4, 29.4) | 579 | 70.4<br>(67.2, 73.5) | 27 | 3.3<br>(2.3, 4.8) |
| Black or Black British  | 89  | 11.6<br>(9.5, 14.1)  | 106 | 13.8<br>(11.5, 16.4) | 195 | 25.4<br>(22.4, 28.6) | 540 | 70.3<br>(67.0, 73.4) | 33 | 4.3<br>(3.1, 6.0) |
| Chinese                 | 27  | 37.0<br>(26.5, 48.8) | 6   | 8.2<br>(3.7, 17.4)   | 33  | 45.2<br>(34.5, 69.0) | 39  | 53.4<br>(41.7, 64.8) | 1  | 1.4               |
| Other                   | 33  | 10.1<br>(7.2, 13.8)  | 40  | 12.2<br>(9.1, 16.2)  | 73  | 22.3<br>(18.1, 27.1) | 240 | 73.2<br>(68.1, 77.7) | 15 | 4.6<br>(2.8, 7.5) |
| Missing                 | 17  | -                    | 10  | -                    | 27  | -                    | 70  | -                    | 10 | -                 |

¥O level: State examination at age 16 years; A level: State examination at age 18 years. §Asian category includes Indian, Pakistani and Bangladeshi
